# Supplementary material
Source: Springer Nature journal article supplement (https://www.springermedizin.de/resource/supplementary/12937_2010_357_MOESM1_ESM.pdf/25653206)

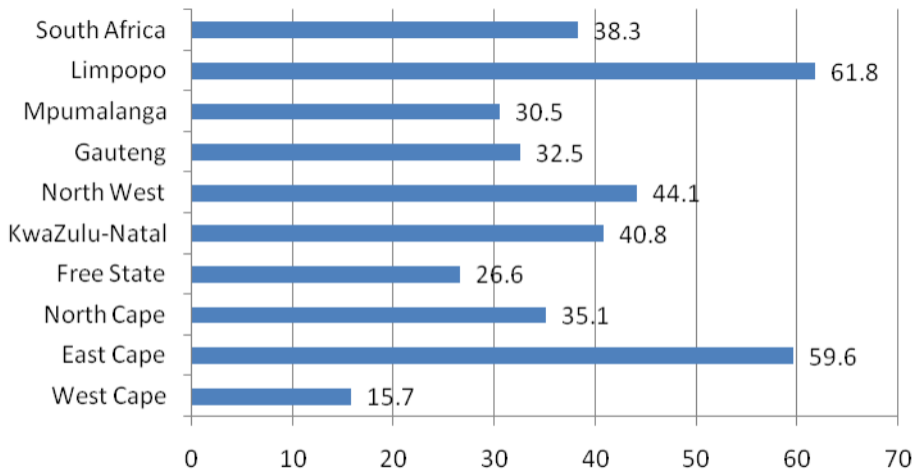

**Percent in province with a dietary diversity score less than 4**

Supplement: MOESM1 [file 25653206]
